# Supplementary material for: Leveraging sequences missing from the human genome to diagnose cancer
Source: bioRxiv or medRxiv preprint supplement (doi:10.1101/2021.08.15.21261805), 2023-01-17
Supplement: Supplementary file [file media-1.pdf]

## Supplementary Material

### Leveraging sequences missing from the human genome to diagnose cancer

Ilias Georgakopoulos-Soares<sup>1,2\*</sup>, Ofer Yizhar Barnea<sup>1,2\*</sup>, Ioannis Mouratidis<sup>3</sup>, Rachael Bradley<sup>1,2</sup>, Ryder Easterlin<sup>1,2</sup>, Candace Chan<sup>1,2</sup>, Emmalyn Chen<sup>4</sup>, John S. Witte<sup>4,5,6</sup>, Martin Hemberg<sup>7,8^</sup>, Nadav Ahituv<sup>1,2^</sup>

<sup>1</sup>Department of Bioengineering and Therapeutic Sciences, University of California San Francisco, San Francisco, California, USA.

<sup>2</sup>Institute for Human Genetics, University of California San Francisco, San Francisco, California, USA.

<sup>3</sup>Department of Computer Science, Katholieke Universiteit Leuven, Leuven, Belgium.

<sup>4</sup>Department of Epidemiology and Biostatistics, University of California San Francisco, San Francisco, California, USA

<sup>5</sup>Department of Urology, University of California San Francisco, San Francisco, California, USA

<sup>6</sup>Departments of Epidemiology and Population Health and Biomedical Data Science, Stanford University School of Medicine, Stanford, California, USA

<sup>7</sup>Wellcome Sanger Institute, Hinxton, UK.

<sup>8</sup>Evergrande Center for Immunologic Diseases, Harvard Medical School and Brigham and Women's Hospital, Boston, USA

\*These authors contributed equally to the work.

^Corresponding authors: [mhemberg@bwh.harvard.edu](mailto:mhemberg@bwh.harvard.edu), [nadav.ahituv@ucsf.edu](mailto:nadav.ahituv@ucsf.edu)

**A**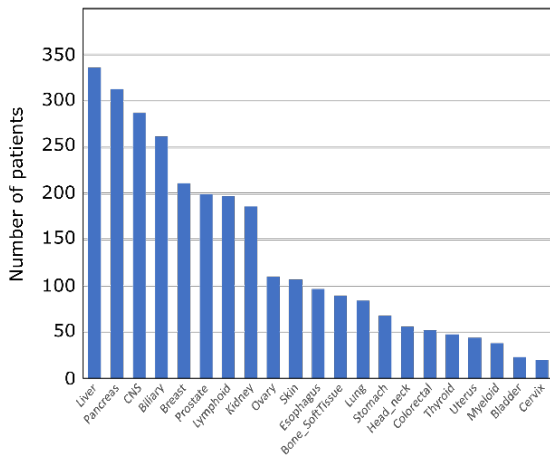**B**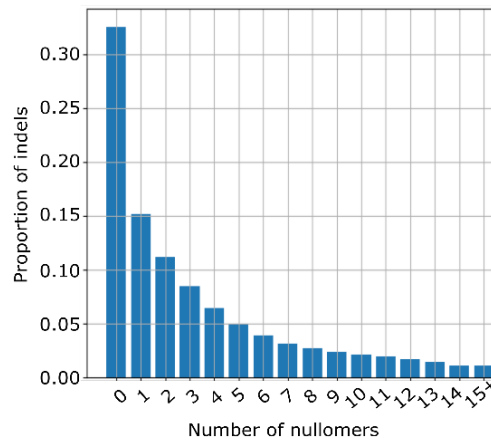**C**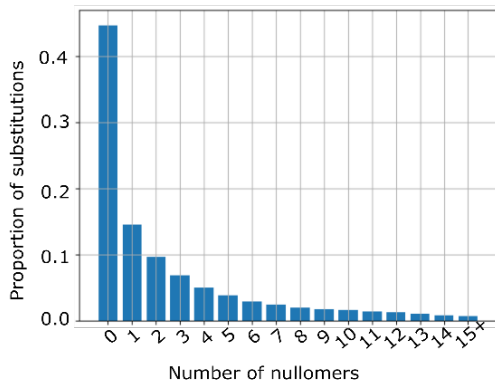**D**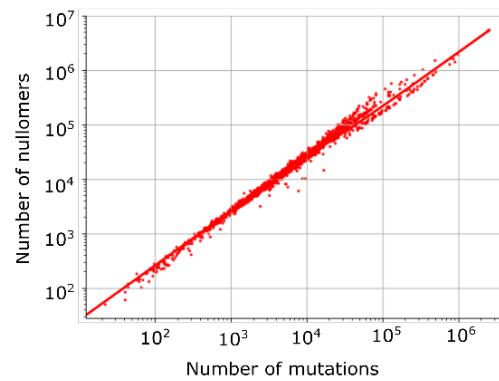**E**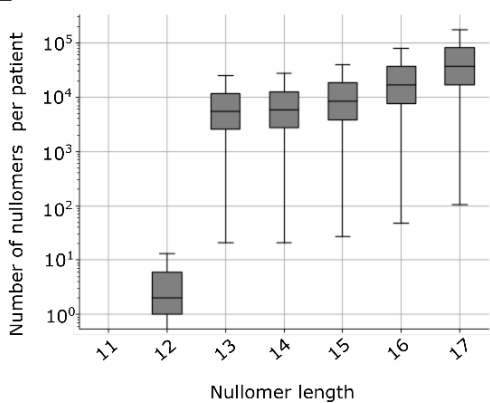

**Figure S1.** (A) Number of patients per cancer tissue. (B-C) Number of nullomers resurfaced due to indels or substitutions observed for each tumor sample (per patient). (D) Association between number of mutations and number of nullomers observed. (E) Number of nullomers of different lengths observed per patient.

**Table S1. Minimal recurrency thresholds and associated number of neomers per tissue type.**

| <b>Cancer tissue</b> | <b>Recurrency threshold</b> | <b>Number of neomers</b> | <b>Number of patients</b> |
|----------------------|-----------------------------|--------------------------|---------------------------|
| Biliary              | 2                           | 166                      | 262                       |
| Bladder              | 2                           | 3,556                    | 23                        |
| Bone_SoftTissue      | 2                           | 2,018                    | 89                        |
| Breast               | 2                           | 27,280                   | 211                       |
| CNS                  | 2                           | 7,238                    | 287                       |
| Cervix               | 2                           | 172                      | 20                        |
| Colorectal           | 4                           | 4,526                    | 52                        |
| Esophagus            | 5                           | 16,278                   | 97                        |
| Head_neck            | 2                           | 10,194                   | 56                        |
| Kidney               | 2                           | 17,584                   | 186                       |
| Liver                | 3                           | 4,756                    | 336                       |
| Lung                 | 3                           | 3,028                    | 84                        |
| Lymphoid             | 4                           | 12,441                   | 197                       |
| Myeloid              | 2                           | 28                       | 38                        |
| Ovary                | 2                           | 13,744                   | 110                       |
| Pancreas             | 2                           | 61,557                   | 313                       |
| Prostate             | 2                           | 5,270                    | 199                       |
| Skin                 | 7                           | 1,534                    | 107                       |
| Stomach              | 3                           | 1,832                    | 68                        |
| Thyroid              | 2                           | 60                       | 48                        |
| Uterus               | 2                           | 8,008                    | 44                        |

**Table S2. Neomers resulting in neoantigens.**

| Gene   | Mutation | Number of Patients | Validation            | Neomers                                                                                                                                                                                                                                                                                                                                                                                                                                                                                                                                              |
|--------|----------|--------------------|-----------------------|------------------------------------------------------------------------------------------------------------------------------------------------------------------------------------------------------------------------------------------------------------------------------------------------------------------------------------------------------------------------------------------------------------------------------------------------------------------------------------------------------------------------------------------------------|
| EP300  | D1399N   | 3                  | Positive              | AACACTATTGAGGTAA, ACTATTGAGGTAAGAT,ATCTTACCTCAATAGT,<br>GAACACTATTGAGGTA,TACCTCAATAGTGTTT, TTACCTCAATAGTGTT                                                                                                                                                                                                                                                                                                                                                                                                                                          |
| BRAF   | L597Q    | 2                  | Positive              | AGGTGATTTTGGTCAA,ATTTTGGTCAAGCTAC,GTAGCTTGACAAAAAT,TAGGTGATTTTGGTCA,TGACCAAAATCACC<br>TA,TGTAGCTTGACCAAAA,TTGACCAAAATCACCT,TTTTGGTCAAGCTACA                                                                                                                                                                                                                                                                                                                                                                                                          |
| TP53   | H193R    | 8                  | Positive              | AAGACGCTGAGGAGGG,ACGCTGAGGAGGGGCC,ACTCGGATAAAGACGCT,AGACGCTGAGGAGGGG,AGCGTCTTAT<br>CCGAGT,CACTCGGATAAAGACGC,CAGCGTCTTATCCGAG,CCACTCGGATAAAGACG,CCCCTCCTCAGCGTCT,CCCTC<br>CTCAGCGTCTT,CCTCAGCGTCTTATCC,CGGATAAAGACGCTGAG,CGTCTTATCCGAGTGG,CTCAGCGTCTTATCCG,C<br>TCGGATAAAGACGCTG,GCGTCTTATCCGAGTG,GGATAAAGACGCTGAGG,GGCCCTCCTCAGCGT,GTCTTATCCGAG<br>TGGA,TCAGCGTCTTATCCGA,TCCACTCGGATAAAGAC, TCGGATAAAGACGCTGA                                                                                                                                        |
| CTNNB1 | G34R     | 3                  | Positive              | AATGGATTTCGAGAGTC,ACCAGAATGGATTTCGA,ACCTGGACTCTCGAAT,ATTCGAGAGTCCAGGT,CACCAGAATGGA<br>TTCG,CCAGAATGGATTTCGAG,CCTGGACTCTCGAATC,CGAATCCATTCTGGTG,CGAGAGTCCAGGTAAG,CTCGAATC<br>CATTCTGG,CTTACCTGGACTCTCG,GACTCTCGAATCCATT,GATTTCGAGAGTCCAGG,TACCTGGACTCTCGAA,TCGA<br>ATCCATTCTGGT,TCGAGAGTCCAGGTA,TTACCTGGACTCTCGA,TTTCGAGAGTCCAGGTA                                                                                                                                                                                                                    |
| TP53   | G266V    | 4                  | Positive-High         | AAGCTGTTCCGTACC,AAGCTGTTCCGTACCA,AATCTACTGGTACGGA,ACCAGTAGATTACCAC,ACTGGTACGGAACA<br>GC,AGCTGTTCCGTACCAG,ATCTACTGGTACGGAA,CAAAGCTGTTCCGTAC,CCGTACCAGTAGATTA,CGTACCAGTA<br>GATTAC,CTACTGGTACGGAACA,CTGGTACGGAACAGCT,CTGTTCCGTACCAGTA,GCTGTTCCGTACCAGT,GGTAAT<br>CTACTGGTAC,GGTACGGAACAGCTTT,GTAATCTACTGGTACG,GTACCAGTAGATTACC,GTACGGAACAGCTTTG,GT<br>GGTAATCTACTGGT,GTTCCGTACCAGTAGA,TAATCTACTGGTACGG,TACGGAACAGCTTTGA,TACTGGTACGGAACA<br>G,TCAAAGCTGTTCCGTA,TCCGTACCAGTAGATT,TCTACTGGTACGGAAC,TGGTACGGAACAGCTT,TGTTCCGTACC<br>AGTAG,TTCCGTACCAGTAGAT |
| TP53   | R337C    | 7                  | Positive-High         | AACATCTCGAAGCACT,AAGCACTCACGCCAC,ACATCTCGAAGCACTC,ACTCACGCCACGGAT,AGCACTCACGCC<br>CAGC,AGTGCTTCGAGATGTT,ATCCGTGGGCGTGAGT,ATCTCGAAGCACTCAC,CACTCACGCCACGGA,CATCTCG<br>AAGCACTCA,CCGTGGGCGTGAGTGC,CGTGAGTGCTTCGAGA,CGTGGGCGTGAGTGCT,CTCGAAGCACTCACGC,G<br>AACATCTCGAAGCAC,GAAGCACTCACGCCCA,GAGTGCTTCGAGATGT,GCACTCACGCCACGG,CGGTGAGTGCTT<br>CGAG,GGAACATCTCGAAGCA,GGCGTGAGTGCTTCGA,GTGAGTGCTTCGAGAT,GTGCTTCGAGATGTT,GTGGGCG<br>TGAGTGCTT,TCCGTGGGCGTGAGTG,TCGAAGCACTCACGCC,TCTCGAAGCACTCACG,TCGAGTGCTTCGAGATG,TG<br>CTTCGAGATGTTCC,TGGGCGTGAGTGCTT     |
| TP53   | C141Y    | 4                  | Positive-Intermediate | AAGACCTACCTGTGC,CAGGGTAGGTCTTGGC,CTGCACAGGGTAGGTC,GACCTACCTGTGCAG,GCACAGGGTAG<br>GTCTT,GCCAAGACCTACCTG                                                                                                                                                                                                                                                                                                                                                                                                                                               |
| TP53   | C135F    | 4                  | Positive-High         | GTCTTGGCCAGTTGGA,TCCAAGTGGCCAAGAC                                                                                                                                                                                                                                                                                                                                                                                                                                                                                                                    |
| ERBB2  | D769Y    | 3                  | Positive-Intermediate | AAATCTTATACGTAAG,AAGAAATCTTATACGT,AATCTTATACGTAAGC,ACGTATAAGATTTCTT,AGAAATCTTATACGT<br>A,AGGGGCTTACGTATAA,ATACGTAAGCCCTCC,ATCTTATACGTAAGCC,CTTACGTATAAGATTT,CTTATACGTAAG<br>CCCC,GAAATCTTATACGTAA,GAGGGGCTTACGTATA,GCTTACGTATAAGATT,GGAGGGGCTTACGTAT,<br>GGCTTACGTATAAGAT,GGGCTTACGTATAAGA,GGGGCTTACGTATAAG,<br>TACGTAAGCCCTCCA,TACGTATAAGATTTCT,TATACGTAAGCCCTC,TCTTATACGTAAGCCC,TGGAGGGGCTTAC<br>GTA,TTACGTATAAGATTTCT,TTATACGTAAGCCCT                                                                                                             |
| TPR    | S2155L   | 2                  | Positive              | AACCTGCGGCAAACCTA,ACCTGCGGCAAACCTAA,AGCAACCTGCGGCAAA,ATTTAGTTTGGCCGAG,CATTTAGTTTGGC<br>GCA,CCATTTAGTTTGGCCG,CCTGCGGCAAACCTAAA,CGGCAAACCTAAATGGA,CTGCGGCAAACCTAAAT,GCAACCTGC<br>GGCAAAC,GCGGCAAACCTAAATGG,GGCAAACCTAAATGGAC,GTCCATTTAGTTTGGC,GTTTGCGGCAAGTTGC,TAGTT<br>TGCCGCAAGTT,TCCATTTAGTTTGGCC,TGCGGCAAACCTAAATG,TTAGTTTGGCCGAGGT,TTAGTTTGGCCGAGG,TT<br>TGCCGCAAGTTGCT                                                                                                                                                                           |
| ASH2L  | E617K    | 2                  | Positive              | ATCACGTGGAGACAAA,TATCACGTGGAGACAA,TTGTCTCCACGTGATA,TTGTCTCCACGTGAT                                                                                                                                                                                                                                                                                                                                                                                                                                                                                   |
| ANKLE2 | E103Q    | 2                  | Positive              | CAGAAAAAATTTGGCTC,GAGCCAATTTTTCTG                                                                                                                                                                                                                                                                                                                                                                                                                                                                                                                    |
| DNMT1  | E432K    | 2                  | Positive              | ATCGAGAAGAATATCA,CGAGAAGAATATCAAA,GAAGAGTTTGATATTC,GAATATCAAACCTTTC,TCGAGAAGAATATC<br>AA,TGATATTTCTCTCGAT,TTGATATTTCTCTCGA,TTTGATATTTCTCTCG                                                                                                                                                                                                                                                                                                                                                                                                          |

**Table S3. Promoter sequences cloned into pGL promoter luciferase plasmid.**

|                                       |                                                                                                                                                                                                                                                                                                                                                                                                                                                                                                                                                                                                                                                                                                                                                                                                                                                                                                                                                                                                                                                                                                                                         |             |
|---------------------------------------|-----------------------------------------------------------------------------------------------------------------------------------------------------------------------------------------------------------------------------------------------------------------------------------------------------------------------------------------------------------------------------------------------------------------------------------------------------------------------------------------------------------------------------------------------------------------------------------------------------------------------------------------------------------------------------------------------------------------------------------------------------------------------------------------------------------------------------------------------------------------------------------------------------------------------------------------------------------------------------------------------------------------------------------------------------------------------------------------------------------------------------------------|-------------|
| <p><i>FRS3-PRICKL4</i><br/>(REF)</p>  | <p>CGCTCCCGGGTCCCCTGCAGCAGCCGCGCCCGCCCGGAGCTAAGGCCTCCCGCCCCGCCCCG<br/>CCCCGCGGCCGCGGGTTCGAGGTCACCGGCAGCACCAACGAGACGCTGCGGGCTGGCGGACCCG<br/>AGCGGGGGCGACCCGGCACGCAGCCTAGAAGTCCCTTTGGAGGACTTTGCAGTCGGGAGCAGTGAG<br/>CATGCGCAGACGCCAGAGGGCGCTCCTGGCCAGGGGCTGAGCAAGCCCGGAGGGGACAGGGCGGA<br/>GCCTGCGGCGGAGGCGGGGCGCGGAGGCGGGGCTGAGGACACCAAAGTTGGGGGTGGTCCGGGG<br/>AGCGGAAAGGGGACGGAGGGTTGGGCGAGAAACGAAGGGAAGGGGAGAGGGTCTGAAGGGACCTG<br/>AAAGGAGAAGGGCAAGACGATGGAACCTGGAAGAGGGTTGAGGGGAGGGGAAGGGGCCAGGGGGA<br/>CCACTGGGGACAAGGGGGAGAGAAGTGAAGGGAACACGCGGAGGAGCGGGGCTGGGAGACCACA<br/>GGGAGAGTTTGGGGAGACCTGGGAAGTGCAGGAGACAGGGCTGCGGGCCCCGGCGAGGCGTTTCC<br/>ATTCAGCGAATGTTGAAAACCCAGCGTAAACGCGGCTCCCGCGTCTGCTGGATGCCTGCCGGGCG<br/>CAGTCCGAGCCAGAGAGCCCTTGCACCTGCATGGCAGAGGCCATGGAGCCCGCACATTTCCACCCTG<br/>AGATCCATAAATGTGGTTTTGTTTTCTTTTTTTTTCTCCCCCAATCTGCAGCTCCAGGCCCTCC<br/>CTGAGCCGCCCTCTCCACCAGCCGGGGAGGGGCGGGCGGGGGCCGCTGGGGCGTGGGAGAGGA<br/>AGGGCCGCGCTATTAGGGCGGGCGGGGCGGACGGGGCGGGCGCTGAAGCCTTGGGGTGGGGA<br/>CCGGTTAGGGGCTGACGGCAGAGTCCGTCCAGAACTGCCCGGACAGCGACGACGAGGGT<br/>GAGACCCAGCGGAGTCTGGTCCCCTCCCCTAAAATCCCAGCAGCCAGACCGGG</p> | <p>1035</p> |
| <p><i>FRS3-PRICKL4</i><br/>(MUT)</p>  | <p>CGCTCCCGGGTCCCCTGCAGCAGCCGCGCCCGCCCGGAGCTAAGGCCTCCCGCCCCGCCCCG<br/>CCCCGCGGCCGCGGGTTCGAGGTCACCGGCAGCACCAACGAGACGCTGCGGGCTGGCGGACCCG<br/>AGCGGGGGCGACCCGGCACGCAGCCTAGAAGTCCCTTTGGAGGACTTTGCAGTCGGGAGCAGTGAG<br/>CATGCGCAGACGCCAGAGGGCGCTCCTGGCCAGGGGCTGAGCAAGCCCGGAGGGGACAGGGCGGA<br/>GCCTGCGGCGGAGGCGGGGCGCGGAGGCGGGGCTGAGGACACCAAAGTTGGGGGTGGTCCGGGG<br/>AGCGGAAAGGGGACGGAGGGTTGGGCGAGAAACGAAGGGAAGGGGAGAGGGTCTGAAGGGACCTG<br/>AAAGGAGAAGGGCAAGACGATGGAACCTGGAAGAGGGTTGAGGGGAGGGGAAGGGGCCAGGGGGA<br/>CCACTGGGGACAAGGGGGAGAGAAGTGAAGGGAACACGCGGAGGAGCGGGGCTGGGAGACCACA<br/>GGGAGAGTTTGGGGAGACCTGGGAAGTGCAGGAGACAGGGCTGCGGGCCCCGGCGAGGCGTTTCC<br/>ATTCAGCGAATGTTGAAAACCCAGCGTAAACGCGGCTCCCGCGTCTGCTGGATGCCTGCCGGGCG<br/>CAGTCCGAGCCAGAGAGCCCTTGCACCTGCATGGTAGAGGCCATGGAGCCCGCACATTTCCACCCTG<br/>AGATCCATAAATGTGGTTTTGTTTTCTTTTTTTTTCTCCCCCAATCTGCAGCTCCAGGCCCTCC<br/>CTGAGCCGCCCTCTCCACCAGCCGGGGAGGGGCGGGCGGGGGCCGCTGGGGCGTGGGAGAGGA<br/>AGGGCCGCGCTATTAGGGCGGGCGGGGCGGACGGGGCGGGCGCTGAAGCCTTGGGGTGGGGA<br/>CCGGTTAGGGGCTGACGGCAGAGTCCGTCCAGAACTGCCCGGACAGCGACGACGAGGGT<br/>GAGACCCAGCGGAGTCTGGTCCCCTCCCCTAAAATCCCAGCAGCCAGACCGGG</p> | <p>1035</p> |
| <p><i>TMEM127-CIAO1</i><br/>(REF)</p> | <p>GGGGCCGAGCGTCCAGGCCCAATCCCGCAACGCCCGGACAGACCCGGGGCCGATGCACTTCCG<br/>GCTTCTCCTCCTCTGCCTCCGCCTCCTCCGGCTCCCGCCCCGTCCCGCGCGCGTACAGCCTG<br/>GGCGCGCCCGCGGCTCTGCGCAGGGCCTCACGGGACTGGTAGTTGAGGCGGTCCCGCGATGCTTT<br/>CCCTGCCGAGGTGAGGGGAGCGACTACAACCTCCAGAGGGTATGGCGGCCGAGCAGTGGGCAGTT<br/>GAGTTTCCGGGGCGACCCAGTCTCCGCGGAAGCGGGAGCCTCTGTGGCCGCGGAAGCCTGGA<br/>GTGGGCGGTACGCAGACGC</p>                                                                                                                                                                                                                                                                                                                                                                                                                                                                                                                                                                                                                                                                                                                                                        | <p>350</p>  |
| <p><i>TMEM127-CIAO1</i><br/>(MUT)</p> | <p>GGGGCCGAGCGTCCAGGCCCAATCCCGCAACGCCCGGACAGACCCGGGGCCGATGCACTTCCG<br/>GCTTCTCCTCCTCTGCCTCCGCCTCCTCCGGCTCCCGCCCCGTCCCGCGCGCGTACAGCCTG<br/>GGCGCGCCCGCGGCTCTGCGCAGGGCCTCACGGGACTGGTAGTTGAGGCGGTCCCGCGATGCTTT<br/>CCCTGCCGAGGTGAGGGGAGCGACTACAACCTCCAGAGGGTATGGCGGCCGAGCAGTGGGCAGTT<br/>GAGTTTCCGGGGCGACCCAGTCTCCGCGGAAGCGGGAGCCTCTGTGGCCGCGGAAGCCTGGA<br/>GTGGGCGGTACGCAGACGC</p>                                                                                                                                                                                                                                                                                                                                                                                                                                                                                                                                                                                                                                                                                                                                                        | <p>350</p>  |
| <p><i>LLRC28-TTC23</i><br/>(REF)</p>  | <p>CCGACTAAATTACCCTTCAAGACGCTAAGCAAAGCCACTCCGTCGACATCAAACCCACGCCGGAG<br/>CCGGAAGCAAGAGTAGAGCCGCGGGGCGGGCCAGCATAGAGGAAGTAGCGCTCTCGGCCAATACAC<br/>AGATCGCTTGCAAACGAGCATTTTCCCGCGCTATCGTGAAGCGCGAGAACACAGGGGATTATCG<br/>CGAGGTTCCGTGCTCCTCTCCCGCTCCCTCTTCCCAGCTCCCTCTGGCGCGGGTTCCGCTCCACCC<br/>CCGGAGCCCCGCCCCGACGCCGCGCTCCGCCCGCCCTCGCTGGCTCCCTGCCCGCCCCG<br/>CCCGCGTCCCCGCTT</p>                                                                                                                                                                                                                                                                                                                                                                                                                                                                                                                                                                                                                                                                                                                                                         | <p>350</p>  |
| <p><i>LLRC28-TTC23</i><br/>(MUT)</p>  | <p>CCGACTAAATTACCCTTCAAGACGCTAAGCAAAGCCACTCCGTCGACATCAAACCCACGCCGGAG<br/>CCGGAAGCAAGAGTAGAGCCGCGGGGCGGGCCAGCATAGAGGAAGTAGCGCTCTCGGCCAATACAC<br/>AGATCGCTTGCAAACGAGCATTTTCCCGCGCTATCGTGAAGCGCGAGAACACAGGGGATTATCG<br/>CGAGGTTCCGTGCTCCTCTCCCGCTCCCTCTTCCCAGCTCCCTCTGGCGCGGGTTCCGCTCCACCC<br/>CCGGAGCCCCGCCCCGACGCCGCGCTCCGCCCGCCCTCGCTGGCTCCCTGCCCGCCCCG<br/>CCCGCGTCCCCGCTT</p>                                                                                                                                                                                                                                                                                                                                                                                                                                                                                                                                                                                                                                                                                                                                                         | <p>350</p>  |
| <p><i>RPS2-SNHG9</i><br/>(REF)</p>    | <p>GGGAGCCTAGACCCGACCCGATGTCCGCGGATTCCCGCCGCCACGCAGAGGCCGCTGCAGCGAC<br/>CAACAGGACTCACGTGTTTTGTCGAAAAGAGAACGAGACCTACTGGGAAGCAGCTTTTATAGCAGC<br/>CCAAGCGCCGAGATCTCCGACGCCCGCCCCAAGCGGGAGCGGGCCGAGCTCCTATAAGACAAC<br/>CTGTGATTGGCTCCGCGTGCCCGCCCTCACCGGCTGTGAGTGCTTTGCCCGTCCGGCCCCAG</p>                                                                                                                                                                                                                                                                                                                                                                                                                                                                                                                                                                                                                                                                                                                                                                                                                                                   | <p></p>     |

|                        |                                                                                                                                                                                                                                                                                                                                                                               |     |
|------------------------|-------------------------------------------------------------------------------------------------------------------------------------------------------------------------------------------------------------------------------------------------------------------------------------------------------------------------------------------------------------------------------|-----|
|                        | CCGCGGCCCGGGAATCTACGTCACCCGAAAAGCGACTATAAACGCCGGCGCCTCCGTCCCCAGCCG<br>CGGCTCGGGAATCCACCC                                                                                                                                                                                                                                                                                      |     |
| <i>RPS2-SNHG9</i>      | GGGAGCCTAGACCCGACCCGATGTCCGCGGATTCCCGCCGCCACGCAGAGGCCCGCTGCAGCAAC<br>CAACAGGACTCACGTGTTTTGTCGGAAAAGAAGAACGAGACCTACTGGGAAGCAGCTTTTATAGCAG<br>CCAAGCGCCGCGAGATCTCCGCAGCCCCGCCCAAGCGGGAGCGGGCCGAGCTCCTATAAGACAAC<br>CTGTGATTGGCTCCGCGGTGCCCGCCCTACCGGGCTCTGAGTGCTCTTGCCCGTCCGGCCCCAG<br>CCGCGGCCCGGGAATCTACGTCACCCGAAAAGCGACTATAAACGCCGGCGCCTCCGTCCCCAGCCG<br>CGGCTCGGGAATCCACCC |     |
| <i>GNAI2<br/>(REF)</i> | CATGTATGTCCATTATGGGCCATCTGTTGACTGTCCCTGCGGACCCGGCCTCCGGGGCACAGCCTTG<br>GAGGTTTCAAATGGCATCCGCTTCGCTGCTGCCTCAGGGAGGAAGAGAAGGGGCGGGAAGGGGCG<br>GCGGCCAGCCTCCTGGGCTGCTTTGCGTTGGGCGCTTGCCCTTCCTGTCTCTGCTGTGAGTGCGG<br>CAGCGGCAGTGAGTGGGTGTCGACGCGGCGGAATGCCCGTCGCTGCTGCTGCTGCTGCCCGACGGG<br>CCTGGGGAGGGCACTCCGGTACCGCTGCCTCCAGTGCCCAGCCAGGAGTCTCTAGACAGCCTCTC<br>CCCAGGCGATTGCAGTT | 350 |
| <i>GNAI2<br/>(MUT)</i> | CATGTATGTCCATTATGGGCCATCTGTTGACTGTCCCTGCGGACCCGGCCTCCGGGGCACAGCCTTG<br>GAGGTTTCAAATGGCATCCGCTTCGCTGCTGCCTCAGGGAGGAAGAGAAGGGGCGGGAAGGGGCG<br>GCGGCCAGCCTCCTGGGCTGCTTTGCGTTGGGCGCTTGCCCTTCCTGTCTCTGCTGTGAGTGCGG<br>CAGCGGCAGTGAGTGGGTGTCGACGCGGCGGAATGCCCGTCGCTGCTGCTGCTGCTGCCCGACGGG<br>CCTGGGGAGGGCACTCCGGTACCGCTGCCTCCAGTGCCCAGCCAGGAGTCTCTAGACAGCCTCTC<br>CCCAGGCGATTGCAGTT | 350 |
