# Supplementary material for: Leveraging sequences missing from the human genome to diagnose cancer
Source: bioRxiv or medRxiv preprint supplement (doi:10.1101/2021.08.15.21261805), 2023-01-17
Supplement: Supplementary file [file media-1.pdf]

**a**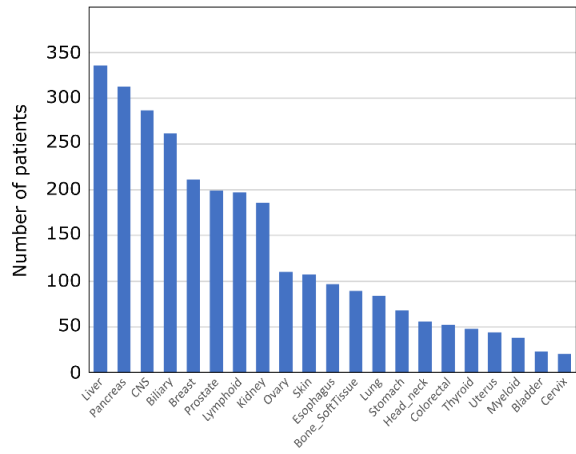**b**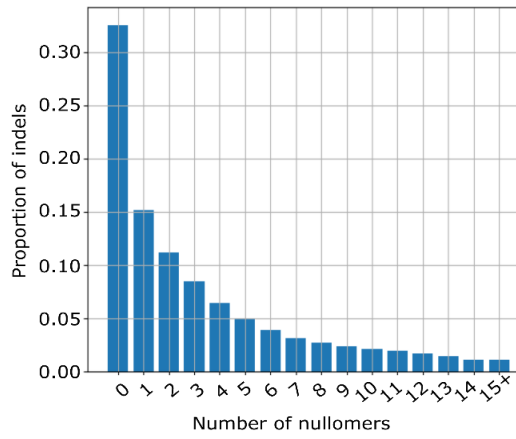**c**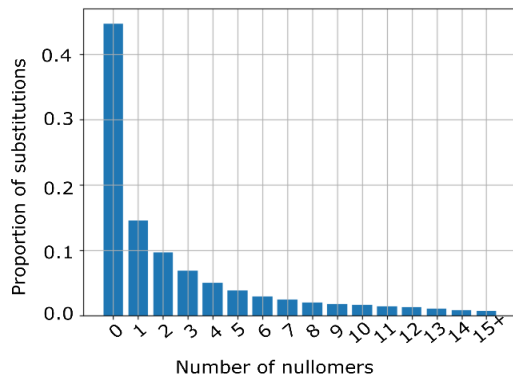**d**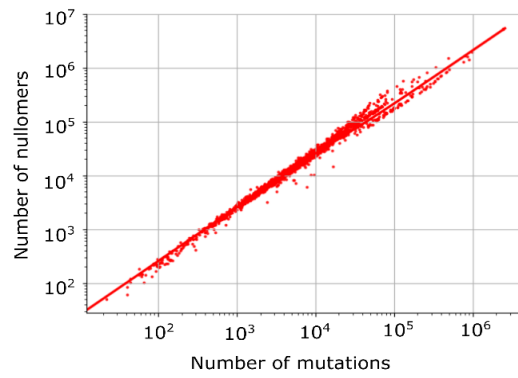**e**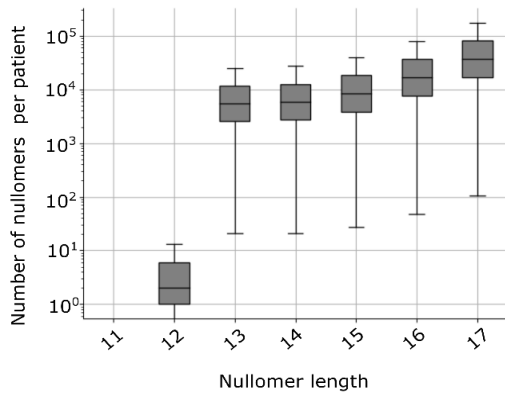

**Extended Data Fig. 1. a**, Number of patients per cancer tissue. **b-c**, Number of nullomers resurfaced due to indels or substitutions observed for each tumor sample (per patient). **d**, Association between number of mutations and number of nullomers observed. **e**, Number of nullomers of different lengths observed per patient.

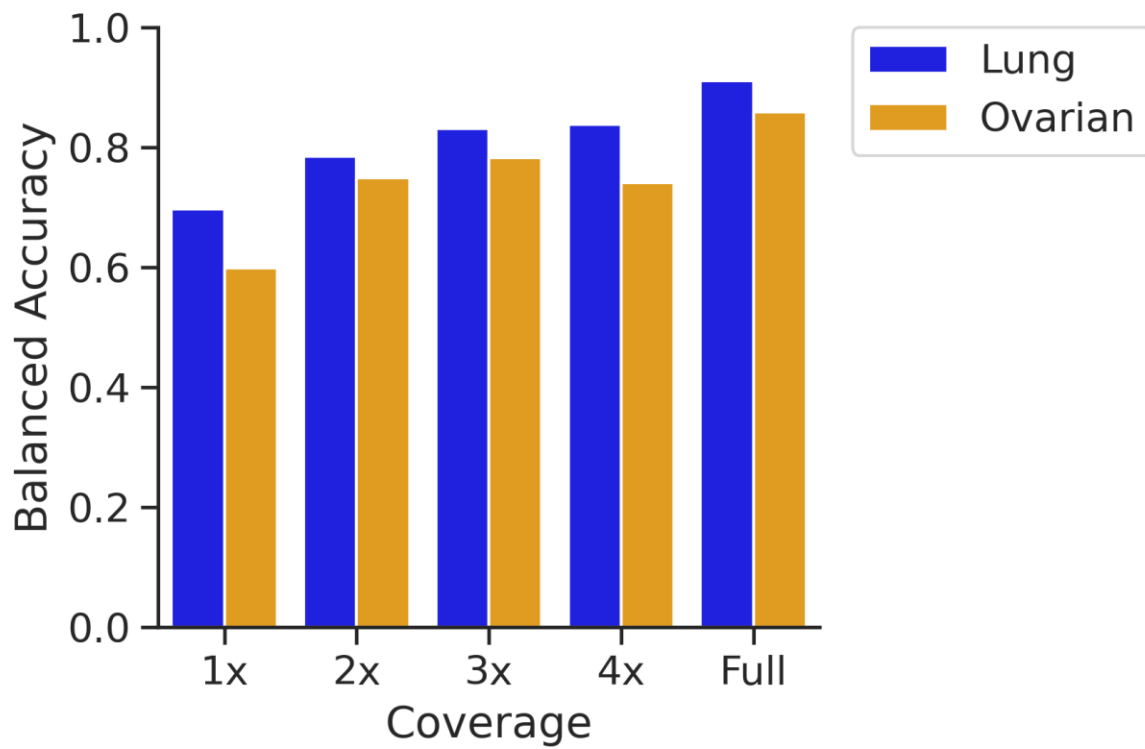

**Extended Data Fig. 2.** Balanced accuracy of lung or ovarian cancer neomer-based assay using different levels of sequencing coverage.

## a RNA/DNA ratio

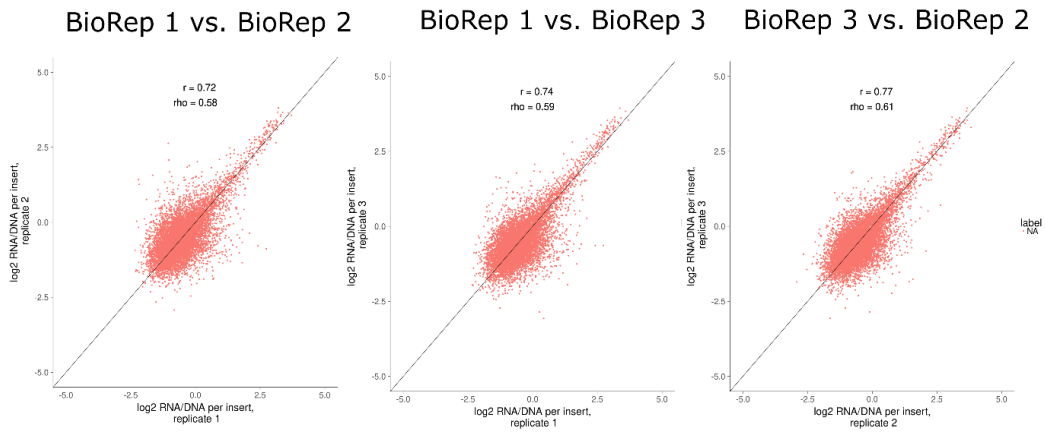

## b DNA ratio

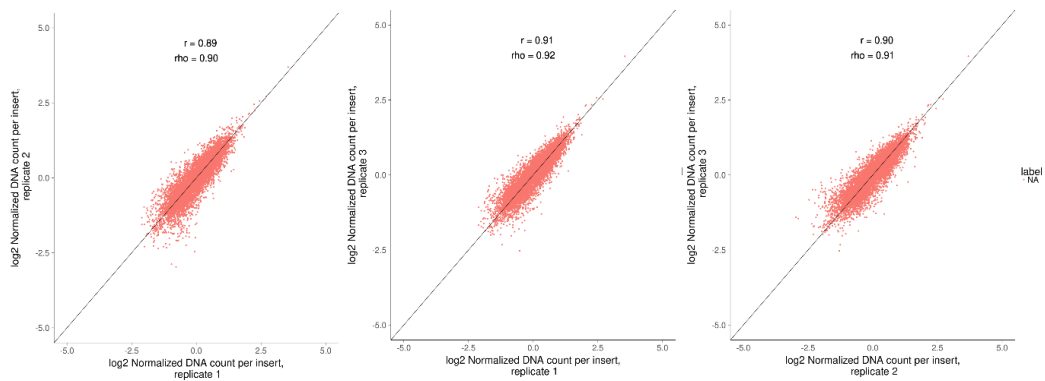

## c RNA ratio

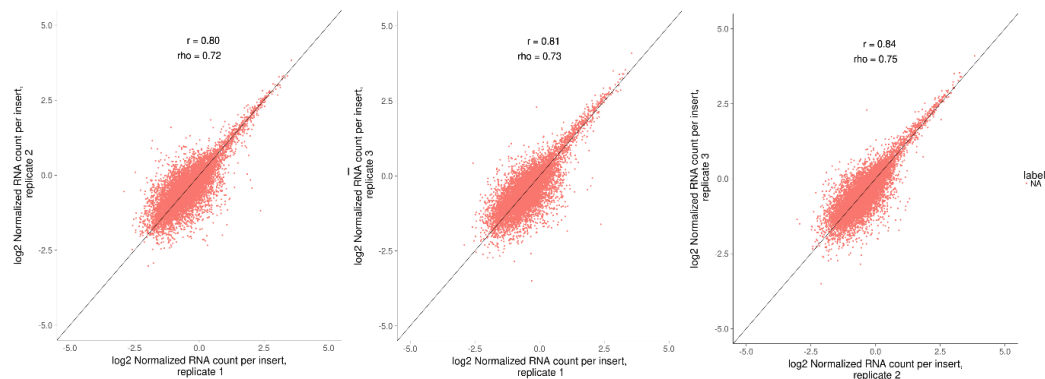

**Extended Data Fig. 3. Correlation between replicates in Porstate MPRA** - All libraries sequences number of normalized reads across all barcodes correlation between the three biological replicates, as calculated for the RNA/DNA ration (a), DNA barcodes alone (b) and RNA barcode alone (c).
